# Supplementary material for: Ionic Liquids as Alternative Curing Agents for Conductive Epoxy/CNT Nanocomposites with Improved Adhesive Properties
Source: MDPI journal article supplement (doi:10.3390/nano13040725), 2023-02-14
Supplement: s1 [file s1]

**Table S1.** Fitting parameters ( $B$  and  $t$ ) and conductivity values corresponding to the  $p_c$  of the epoxy/CNT/IL NCs cured with IL-P-TMPP, IL-P-DCA and IL-I-DCA and of the reference epoxy/CNT/Aradur systems.

| System    | $B$ (S/cm)           | $t$  | $\sigma(p_c)$ (S/cm)  |
|-----------|----------------------|------|-----------------------|
| IL-P-TMPP | $6.66 \cdot 10^{-6}$ | 2.72 | $7.16 \cdot 10^{-15}$ |
| IL-P-DCA  | $7.91 \cdot 10^{-6}$ | 3.67 | $6.52 \cdot 10^{-13}$ |
| IL-I-DCA  | $7.44 \cdot 10^{-8}$ | 2.32 | $2.15 \cdot 10^{-13}$ |
| Aradur    | $1.22 \cdot 10^{-7}$ | 1.45 | $6.09 \cdot 10^{-15}$ |
